# Supplementary material for: Ginseng extracts modulate mitochondrial bioenergetics of live cardiomyoblasts: a functional comparison of different extraction solvents
Source: PubMed Central journal article supplement — J Ginseng Res. 2018 Feb 12;43(4):517–26. doi: 10.1016/j.jgr.2018.02.002 (PMC6823796; doi:10.1016/j.jgr.2018.02.002), 2018-02-12
Supplement: mmc1.pdf [file mmc1.pdf]

1 **Ginseng extracts modulate mitochondrial bioenergetics of live**  
2 **cardiomyoblasts: a functional comparison of different polar**  
3 **extracts**

4

5 Yun Huang<sup>1,2</sup>, Kenneth Kin Leung Kwan<sup>2</sup>, Ka Wing Leung<sup>1,2</sup>, Ping Yao<sup>2</sup>, Huaiyou Wang<sup>1,2</sup>,  
6 Tina Ting Xia Dong<sup>1,2</sup>, Karl Wah Keung Tsim<sup>1,2,\*</sup>

7

8 <sup>1</sup>*HKUST Shenzhen Research Institute, Hi-Tech Park, Nanshan, Shenzhen, 518000,*  
9 *Guangdong Province, China*

10 <sup>2</sup>*Division of Life Science and Center for Chinese Medicine, The Hong Kong University of*  
11 *Science and Technology, Clear Water Bay, Hong Kong, China*

12

13 Running title: Ginseng extracts modulate mitochondrial bioenergetics of cardiomyoblasts

14

15 \* Corresponding author. Division of Life Science and Center for Chinese Medicine, The  
16 Hong Kong University of Science and Technology, Clear Water Bay, Hong Kong, China.

17 *E-mail address:* botsim@ust.hk (Karl W. K. Tsim).

18

## List of Contents

19 **Table S1.** Mass spectra properties of marker chemicals in ginseng extracts.

20 **Table S2.** Calibration curves, LOD, LOQ, precision, repeatability and recovery of 4 marker chemicals in  
21 ginseng extracts

22 **Fig. S1.** The effects of ginseng extracts to cell viability of H9C2 cells. Cultured H9C2 cells were treated  
23 with ginseng extracts (0-100  $\mu\text{g/mL}$ ) for 24 hours. Cell viability was determined by MTT assay. Data  
24 are expressed as Mean  $\pm$  SD,  $n = 5$ , each with triplicate samples. \*\*\* $p < 0.001$ .

25 **Fig. S2.** Schematic representation of metabolic parameters of mitochondrial respiration measured by  
26 Seahorse Bioscience XFp extracellular flux analyzer. Basal respiration represents energetic demand  
27 of the cell under baseline conditions. Proton leak shows the remaining basal respiration and is the  
28 difference in OCR after oligomycin and rotenone/antimycin A (R&A) injection. ATP production is  
29 the difference between basal respiration and proton leak and represents the portion of basal respiration  
30 that is being used to drive ATP production. Maximal respiration shows the maximum rate of  
31 respiration that the cell can achieve, which is calculated as the OCR after FCCP injection. Spare  
32 respiratory capacity is the difference between maximal and basal OCR and can be an indicator of cell  
33 fitness or flexibility. The non-mitochondrial rate was subtracted from all other rates, which is a result  
34 of a subset of cellular enzymes that continue to consume oxygen after rotenone/antimycin A addition.

35 **Fig. S3.** Optimization of cell density, FCCP and tBHP dosage in XFp Mito Stress Test. **(A)** Cultured H9C2  
36 cells with increasing cell density were seeded in XFp Cell Culture Miniplate and cultured for 48 hours  
37 before basal OCR was measured. **(B)** H9C2 cells (5,000 cells/well) were cultured for 48 hours, then  
38 treated with 1  $\mu\text{M}$  oligomycin and three serial injections of FCCP at different concentrations (a high  
39 concentration range of 3, 6, 12  $\mu\text{M}$  and a low concentration range of 0.75, 1.5, 3  $\mu\text{M}$ ). The resulting  
40 data set characterizes the cells' response to 6 doses of FCCP. **(C)** Cultured H9C2 cells (5,000  
41 cells/well) were exposed to tBHP at various concentrations for 24 hours, and OCR was determined.  
42 The above mentioned OCR values were normalized with cellular protein. Data are expressed as mean  
43  $\pm$  SD,  $n = 3$ , each with triplicate samples.

**Table S1**

Mass spectra properties of marker chemicals in ginseng extracts.

| Chemical         | Formula                                         | Calculated mass [M] | Precursor ion [M-H] <sup>1)</sup> | Fragmentor energy | Collision energy | Product ion <sup>2)</sup> |
|------------------|-------------------------------------------------|---------------------|-----------------------------------|-------------------|------------------|---------------------------|
| Ginsenoside Rb1  | C <sub>54</sub> H <sub>92</sub> O <sub>23</sub> | 1108.6              | 1107.6                            | 250               | 41               | 945.5                     |
|                  |                                                 |                     |                                   |                   | 49               | 783.5                     |
| Ginsenoside Rd   | C <sub>48</sub> H <sub>82</sub> O <sub>18</sub> | 946.5               | 945.5                             | 250               | 33               | 783.5                     |
|                  |                                                 |                     |                                   |                   | 45               | 621.6                     |
| Ginsenoside Re   | C <sub>48</sub> H <sub>82</sub> O <sub>18</sub> | 946.5               | 945.5                             | 250               | 41               | 637.5                     |
|                  |                                                 |                     |                                   |                   | 53               | 475.5                     |
| Ginsenoside Rg1  | C <sub>42</sub> H <sub>72</sub> O <sub>24</sub> | 800.5               | 799.5                             | 250               | 21               | 637.3                     |
|                  |                                                 |                     |                                   |                   | 37               | 475.4                     |
| Astragaloside IV | C <sub>41</sub> H <sub>68</sub> O <sub>14</sub> | 784.9               | 829.5 <sup>3)</sup>               | 190               | 5                | 829.5                     |
|                  |                                                 |                     |                                   |                   | 25               | 783.2                     |

<sup>1)</sup>The detected chemicals had better responses under the negative mode: the [M-H]<sup>-</sup> was used as the precursor ion.

<sup>2)</sup>Two pairs of collision energy and product ions were used for the MRM analysis to guarantee the precision of analytes.

<sup>3)</sup>The precursor ion of astragaloside IV was [M + HCOOH - H]<sup>-</sup> under the negative mode.

**Table S2**

Calibration curves, LOD, LOQ, precision, repeatability and recovery of 4 marker chemicals in ginseng extracts

| Ginsenoside | Calibration curve <sup>1)</sup> | Correlation coefficient (r <sup>2</sup> ) | Range (ng) | LOD (ng) <sup>2)</sup> | LOQ (ng) <sup>3)</sup> | Precision (n = 6) <sup>4)</sup> |                         | Repeatability (n = 5) |         | Recovery <sup>7)</sup> (n = 3) |         |
|-------------|---------------------------------|-------------------------------------------|------------|------------------------|------------------------|---------------------------------|-------------------------|-----------------------|---------|--------------------------------|---------|
|             |                                 |                                           |            |                        |                        | Intra-day <sup>5)</sup>         | Inter-day <sup>6)</sup> | Mean (%)              | RSD (%) | Mean (%)                       | RSD (%) |
| Rb1         | y = 76.2x - 293.2               | 0.9995                                    | 2-200      | 0.329                  | 1.146                  | 1.99                            | 1.72                    | 98.66                 | 1.25    | 98.66                          | 1.25    |
| Rd          | y = 192.2x - 1102.8             | 0.9994                                    | 1-100      | 0.156                  | 0.632                  | 2.81                            | 2.12                    | 99.87                 | 2.81    | 99.87                          | 2.81    |
| Re          | y = 169.2x - 22.1               | 0.9992                                    | 1-50       | 0.199                  | 0.651                  | 2.88                            | 2.18                    | 98.19                 | 2.98    | 98.19                          | 2.98    |
| Rg1         | y = 401.1x - 1109.1             | 0.9991                                    | 1-50       | 0.167                  | 0.631                  | 1.89                            | 1.32                    | 99.19                 | 2.11    | 99.19                          | 2.11    |

<sup>1)</sup>The calibration curve was derived from six data points, n = 3.

<sup>2)</sup>LOD refers to the limits of detection.

<sup>3)</sup>LOQ refers to the limits of quantification.

<sup>4)</sup>The value of RSD (%) were presented.

<sup>5)</sup>The intra-day analysis refers to the sample examined for six replicates within one day.

<sup>6)</sup>The inter-day analysis refers to the sample examined in duplicates over three consecutive days.

<sup>7)</sup>Recovery (%) = 100 × (amount found - original amount)/amount spiked. The data were presented as average of three independent determinations, and the SD was < 5% of the mean, which was not shown for clarity.

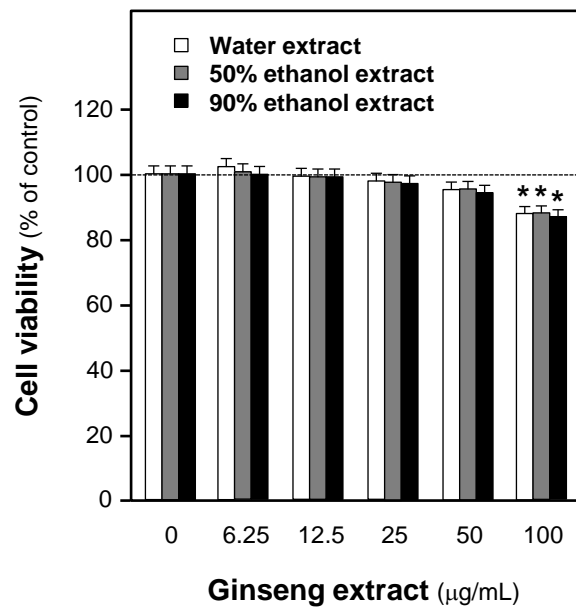

**Fig. S1**

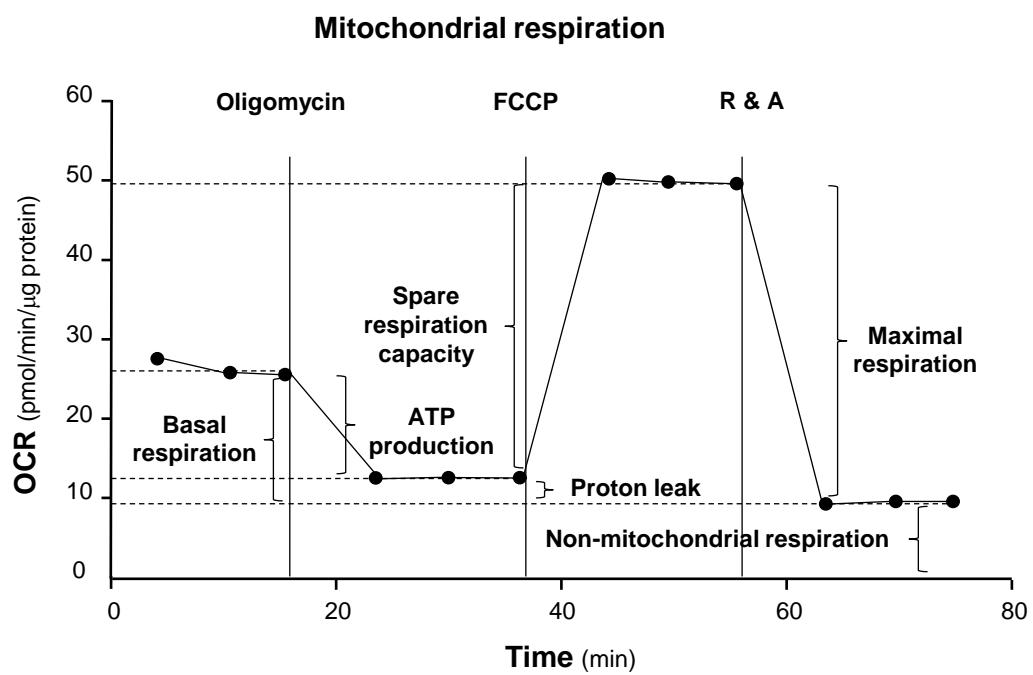

**Fig. S2**

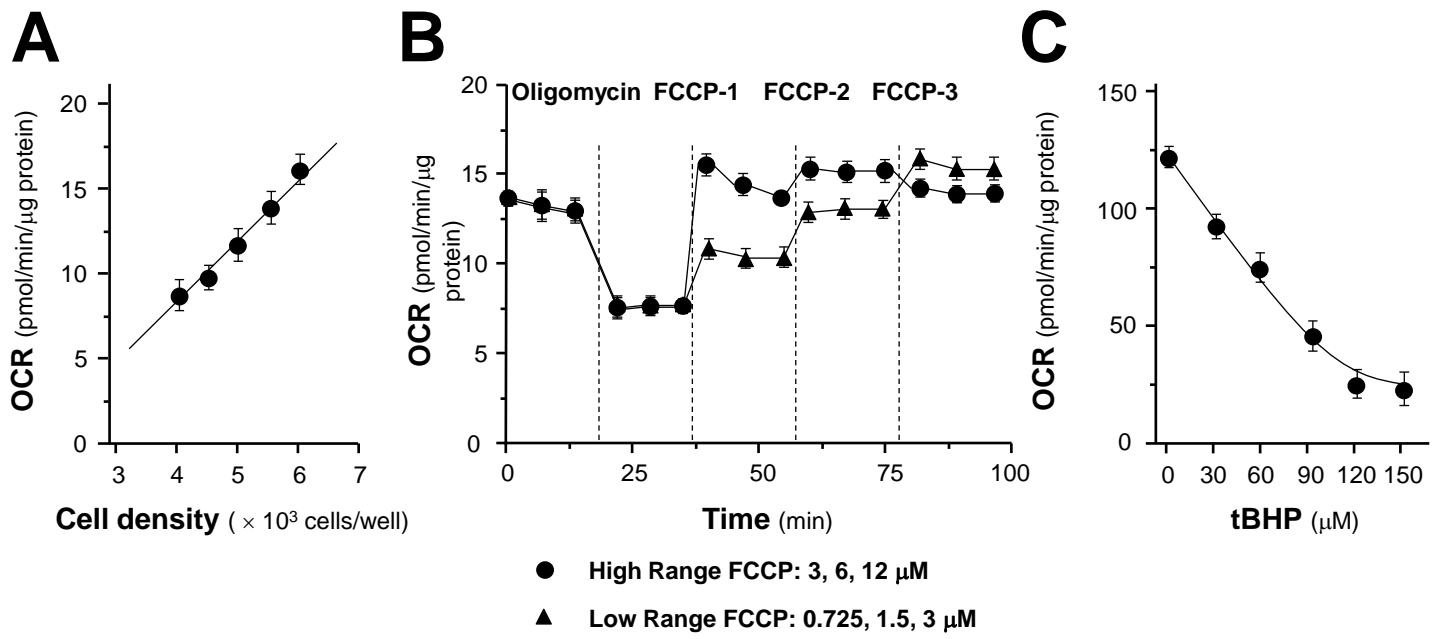

**Fig. S3**
